# Supplementary material
Source: PubMed Central journal article supplement (PMC9006438)
Supplement: NIHMS1781170-supplement-Supplemental_Material.pdf [file NIHMS1781170-supplement-Supplemental_Material.pdf]

## Supplementary Figure S1

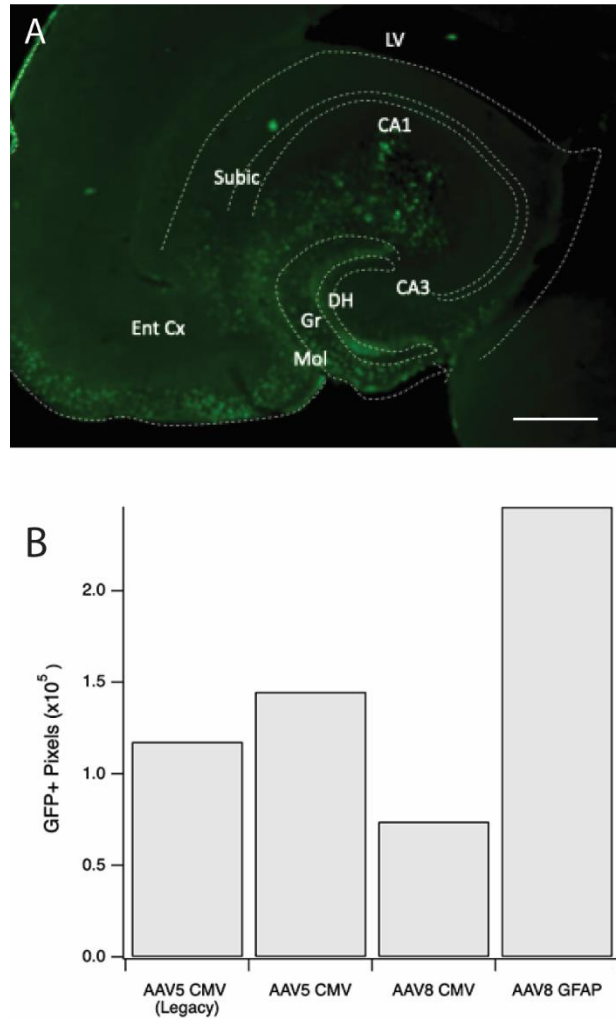

**Figure S1. A.** Horizontal section of the entorhinal-hippocampal territory of an AAV8-GFAP-GFP-Cre injected  $GS^{flx/flx}$  mouse. The section is immunostained for green fluorescent protein (GFP), which is expressed numerous transfected cells in the entorhinal cortex (EC) and hippocampal formation. **B.** The bar graphs depict the extent of viral transfection after a single injection, measured as GFP-positive pixels in the entorhinal-hippocampal territory. Abbreviations: DH, dentate hilus; Gr, granule cell layer of the dentate gyrus; Mol, molecular layer of the dentate gyrus; SUB, subiculum; LV, lateral ventricle. Scale bar in A = 0.5mm.

## Supplementary Figure S2

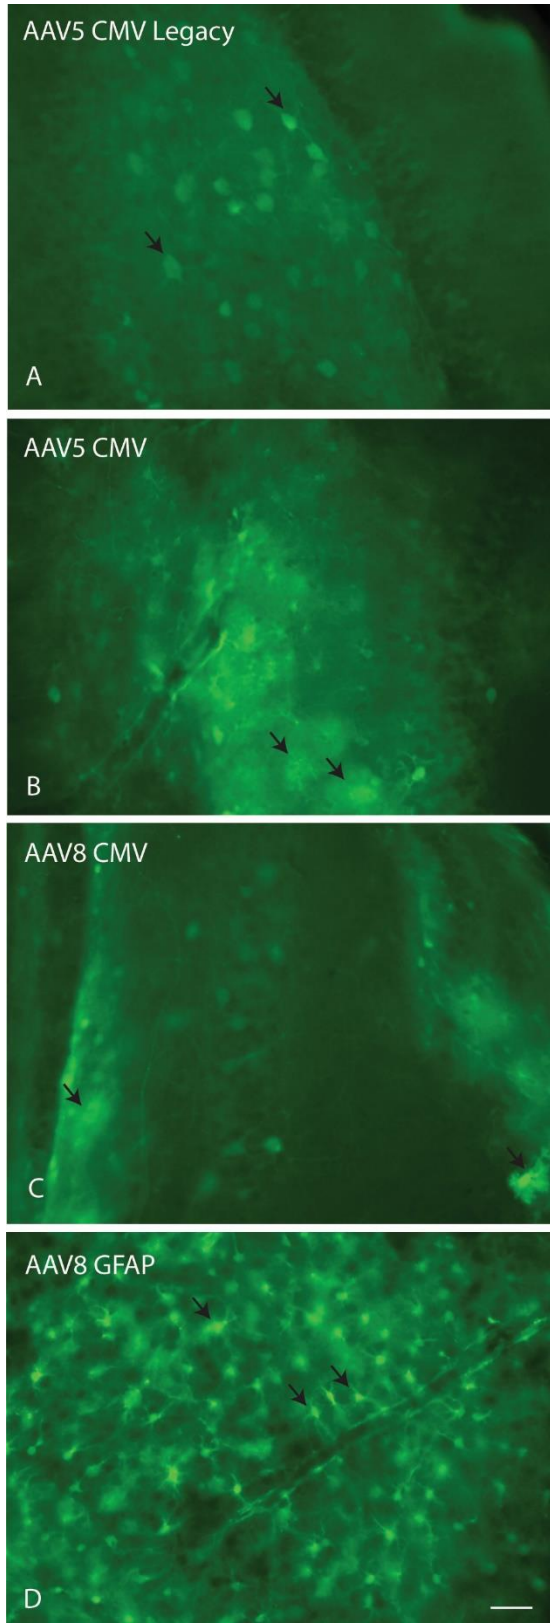

### Figure S2. Neuronal and glial selectivity of the different viral vectors tested in the study.

Horizontal sections through the virus injected hippocampi were stained for green fluorescent protein 4 to 6 weeks after the injection. **A.** AAV5 CMV Legacy preferentially infects neurons (arrows). **B.** AAV5 CMV infects both neurons and astrocytes (arrows). **C.** AAV8 CMV infects both neurons and astrocytes (arrows). **D.** AAV8 GFAP preferentially infects astrocytes (arrows). Scale bar in D = 50  $\mu\text{m}$  (same magnification for all pictures).
